# Supplementary material for: Cerium oxide nanoparticle functionalized lignin as a nano-biosorbent for efficient phosphate removal
Source: Royal Society of Chemistry journal article supplement (doi:10.1039/c9ra09986g), 2020-01-01
Supplement: c9ra09986g1.pdf [file c9ra09986g1.pdf]

## Supporting information

### **Cerium oxide nanoparticles functionalized lignin as a nano-biosorbent for efficient phosphate removal**

Xiaohuan Liu<sup>a,b</sup>, Xia He<sup>c</sup>, Jiantao Zhang<sup>b</sup>, Jiayao Yang<sup>b</sup>, Xiaofei Xiang<sup>c</sup>, Zhongqin Ma<sup>b</sup>, Lina Liu<sup>b</sup>, Enmin Zong<sup>c,d,\*</sup>

<sup>a</sup> *Department of Environmental Science, Zhejiang University, 388 Yuhangtong Road, Hangzhou, 310058, PR China*

<sup>b</sup> *Department of Materials, Zhejiang A & F University, 666 Wusu Street, Hangzhou 311300, PR China*

<sup>c</sup> *Department of Environmental Engineering, Taizhou University, 1139 Shifu Street, Taizhou 318000, PR China*

<sup>d</sup> *School of Earth Sciences and Engineering, Nanjing University, Nanjing 210093, China*

<sup>e</sup> *College of Materials and Textiles, School of Art & Design, Zhejiang Sci-Tech University, Hangzhou 310018, PR China*

\* Correspondence author should be addressed at: zongenmin@tzc.edu.cn (E.M. Z).

#### **Table S1**

**Table S1.** The phosphate adsorption capacity of L-NH<sub>2</sub>@Ce in comparison with some biosorbents

| Biosorbents                           | Dosage (g L <sup>-1</sup> ) | Temperature | Initial P concentration range (mg L <sup>-1</sup> ) | pH        | Adsorption capacities (mg g <sup>-1</sup> ) | Equilibrium time (min)/ initial P concentration (mg L <sup>-1</sup> ) | Ref.       |
|---------------------------------------|-----------------------------|-------------|-----------------------------------------------------|-----------|---------------------------------------------|-----------------------------------------------------------------------|------------|
| L-NH <sub>2</sub> @Ce                 | 1.25                        | 25          | 1.94–43.66                                          | 6.0 ± 0.2 | 27.86                                       | 60/10                                                                 | This study |
| Ce/Fe <sub>3</sub> O <sub>4</sub> -BC | 1.0                         | 25          | 5.0-75.0                                            | 6.08      | 18.75                                       | 600/50                                                                | 1          |
| La/Fe <sub>3</sub> O <sub>4</sub> -BC | 1.0                         | 25          | 5.0-75.0                                            | 6.12      | 25                                          | 300/50                                                                | 1          |
| Fe-CL                                 | 1.25                        | 45          | ~5.0                                                | 7         | 0.942                                       | -                                                                     | 18         |
| LBR-Zr                                | 1.25                        | 25          | 2-38                                                | 6.0±0.2   | 8.75                                        | 489/10                                                                | 23         |
| ILO                                   | 0.02                        | 25          | ~25                                                 | 3         | 4.785                                       | 1440/100                                                              | 33         |
| Fe-treated fiber                      | 2.0                         | 25          | -                                                   | 5.3 ± 0.3 | 4.30                                        | -                                                                     | 34         |
| HA-MNP                                | 1.0                         | 25          | 5-100                                               | 6.6       | 28.9                                        | 60/2                                                                  | 35         |
| Iron hydroxide eggshell               | 7.5                         | 45          | 7-140                                               | 7         | 14.49                                       | 220/14                                                                | 45         |
| SHEC-g-PAPTAC                         | 1.0                         | 50          | 50-160                                              | 5         | 46.9                                        | 45/100                                                                | 46         |
| PVA hydrogel beads                    | 50                          | 30          | 0-110                                               | 6         | 11.5                                        | 480/50                                                                | 47         |
| Ws-N-Zr                               | 0.5                         | 25          | -                                                   | 6.0±0.1   | 31.9                                        | 120/10                                                                | 48         |
| Al-eggshell                           | 6.72                        | 50          | 0.5-200                                             | 6.12      | 11.52                                       | 120/50                                                                | 49         |
